# Supplementary material
Source: PubMed Central journal article supplement (PMC6711382)
Supplement: NIHMS1516746-supplement-1.pdf [file NIHMS1516746-supplement-1.pdf]

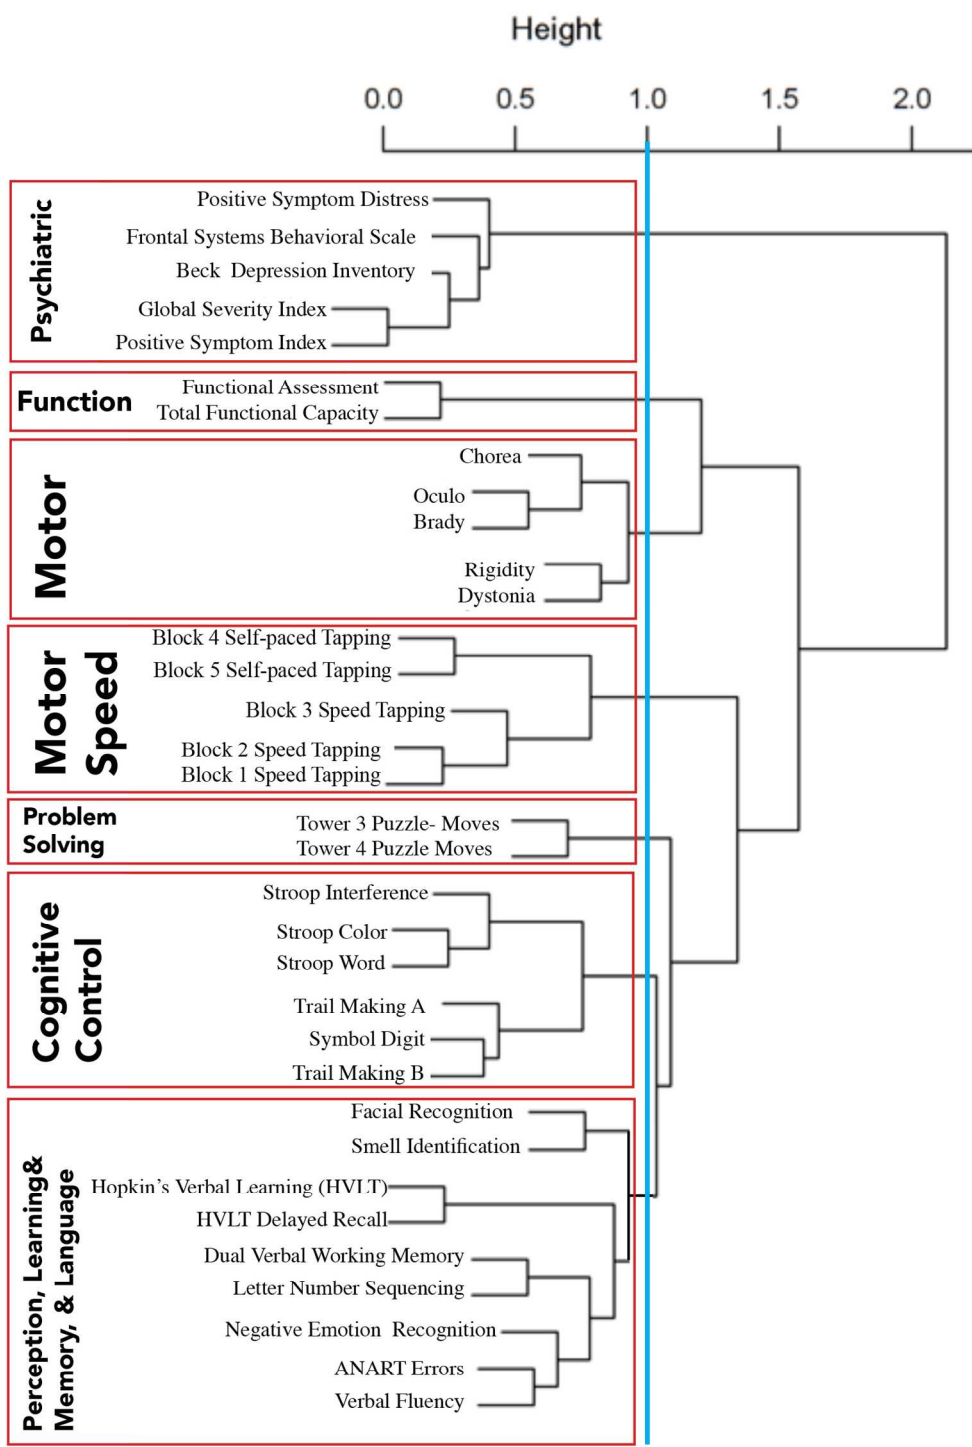

Figure 1. Clustering chart.

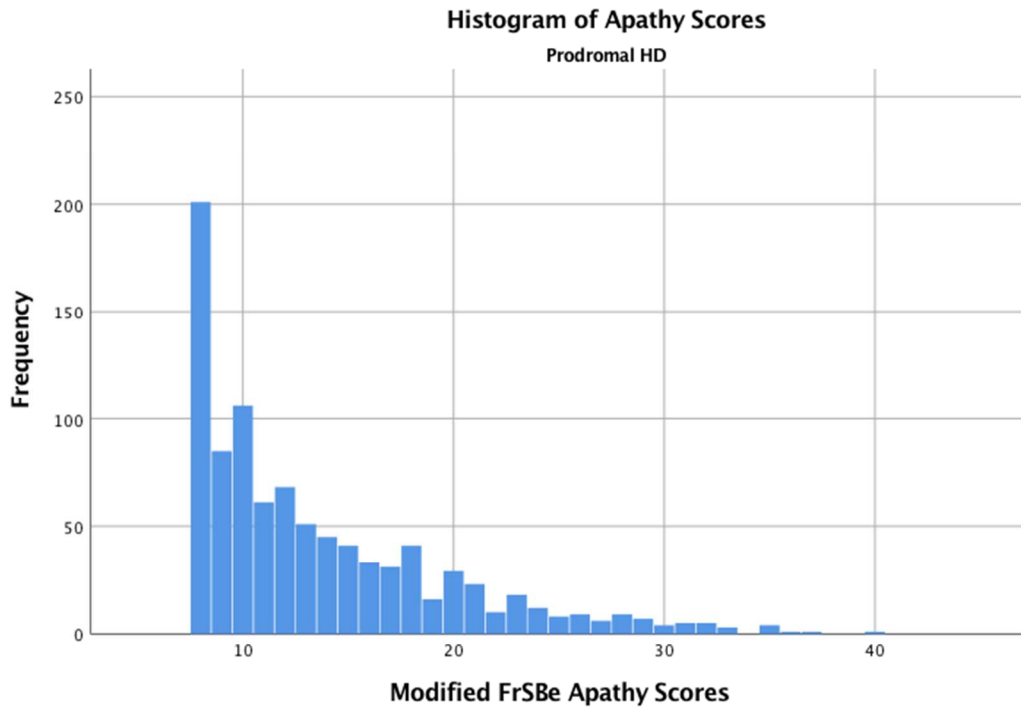

*Supplementary Figure 2.* Distribution of Apathy scores of prHD individuals

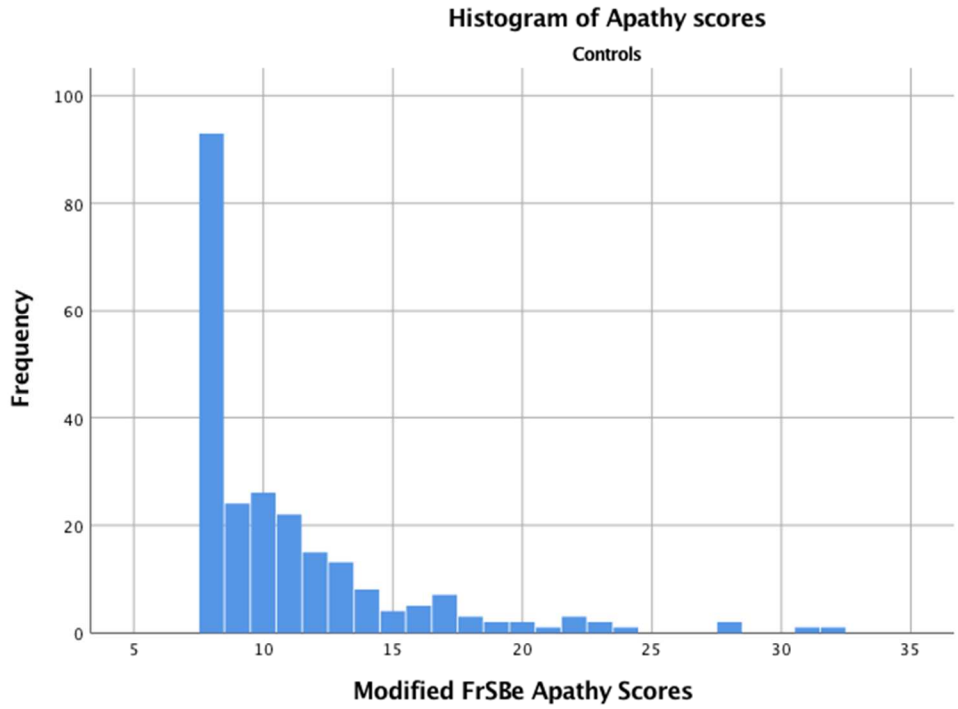

Supplementary Figure 3. Distribution of Apathy scores of controls

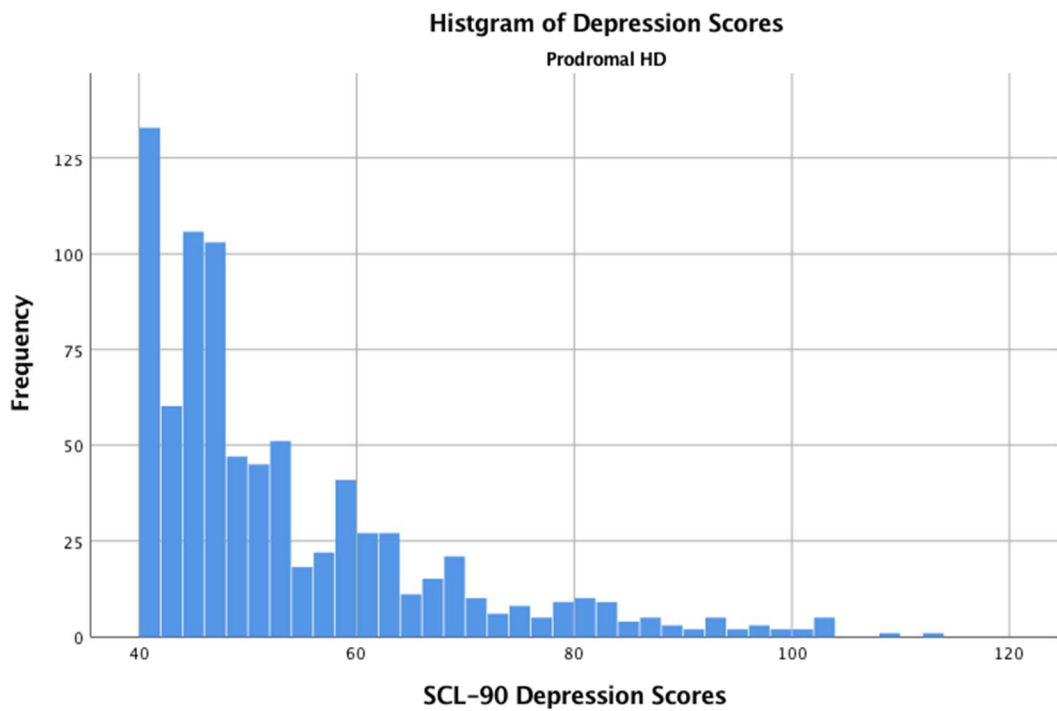

Supplementary Figure 4. Distribution of Depression scores of prHD individuals

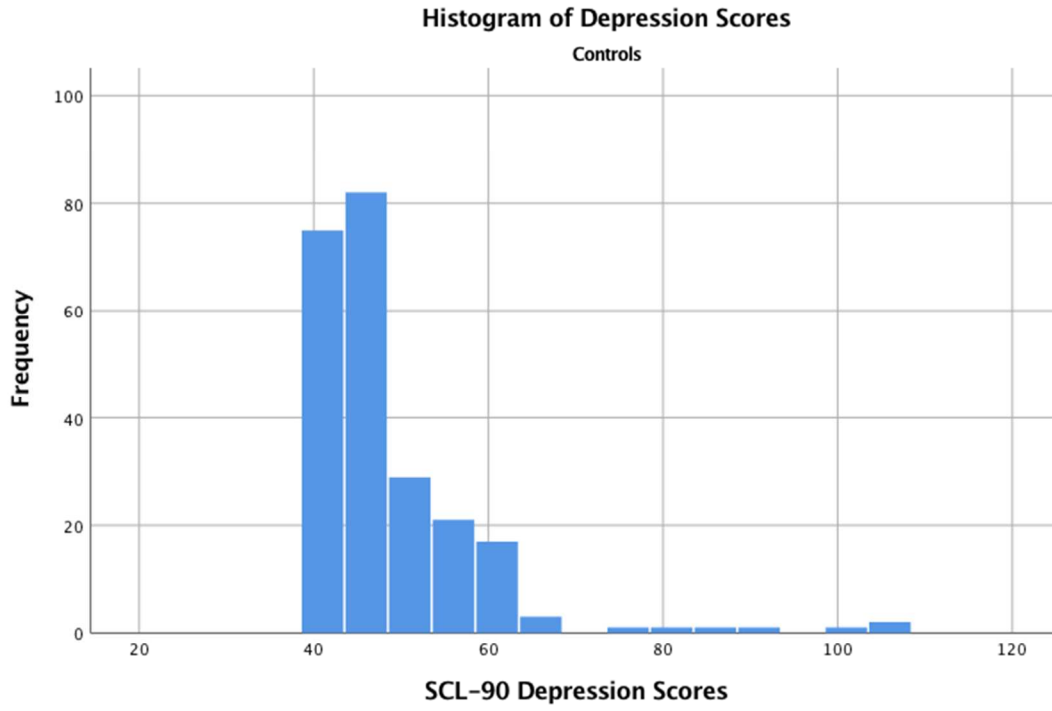

*Supplementary Figure 5.* Distribution of Depression scores of controls
